# Supplementary material
Source: PubMed Central journal article supplement (PMC10164819)
Supplement: ajcr0013-1425-f7.pdf [file ajcr0013-1425-f7.pdf]

## Induced dedifferentiated glioblastoma stem cells models

**Table S1.** Markers used for gliosphere characterization by RT-qPCR, flow cytometry or immunocytochemistry

| Protein or antigen | Other or complete name                              | Main function                               | Localization       | Role in GBM                                                                                                  | Associated with | Technique used | References   |
|--------------------|-----------------------------------------------------|---------------------------------------------|--------------------|--------------------------------------------------------------------------------------------------------------|-----------------|----------------|--------------|
| A2B5               |                                                     | Ganglioside epitope                         | Membrane           | Associated with clonogenicity, growth, aggressivity, migration and invasion.                                 | GSC             | FC             | [34, 47, 48] |
| ALDH1A3            | Aldehyde Dehydrogenase 1 Family Member A3           | Enzyme involved in aldehydes detoxification | Cytoplasm          | Involved in mesenchymal GSC growth.                                                                          | MES GSC         | RT-qPCR        | [8]          |
| Bmi-1              | Polycomb complex protein BMI-1                      | Enzyme involved in gene repression          | Cytoplasm-Nucleus  | Stem cell self-renewal. Growth and survival in stress condition: therapeutic resistance.                     | MES GSC         | RT-qPCR        | [49, 50]     |
| CD133              | Prominin-1 ( <i>PROM1</i> )                         | Receptor                                    | Membrane           | Therapeutic resistance. GSC maintenance.                                                                     | PN GSC          | RT-qPCR/FC     | [11, 51-53]  |
| CD36               | Platelet glycoprotein 4                             | Scavenger receptor                          | Membrane           | GSC maintenance and metabolism.                                                                              | PN GSC          | FC             | [54]         |
| CD44               | Homing cell adhesion molecule                       | Receptor                                    | Membrane           | Adhesion, migration and invasion via extracellular matrix recognition. GSC promotion.                        | MES GSC         | RT-qPCR/FC     | [11, 38, 51] |
| CD74               | HLA class II histocompatibility antigen gamma chain | Receptor                                    | Membrane           | MIF and DDT receptor. Expressed in GBM. GSC maintenance.                                                     | GBM/GSC         | RT-qPCR/FC     | [45, 55]     |
| CD90               | Thymocyte differentiation antigen 1 (Thy-1)         | Cell surface immunoglobulin                 | Membrane           | Expressed in GBM. Macrophages interaction. Expressed in GSC but not necessary for stemness.                  | GSC             | FC             | [26, 27]     |
| E-Cadherin         | <i>CDH1</i>                                         | Cell adhesion molecule                      | Membrane           | Higher expression in GBM.                                                                                    | EMT             | RT-qPCR        | [56]         |
| N-Cadherin         | <i>CDH2</i>                                         | Cell adhesion molecule                      | Membrane           | Higher expression in GBM. Prognosis factor. Associated with resistance.                                      | EMT             | RT-qPCR        | [56, 57]     |
| CXCL12             | Stromal cell-derived factor 1 (SDF-1)               | Cytokine                                    | Cytoplasm-secreted | Associated to CXCR4/7.                                                                                       | GSC             | RT-qPCR        | [58]         |
| CXCR2              | Interleukin 8 receptor, beta                        | Receptor                                    | Membrane           | MIF receptor, IL-8 receptor (interaction with endothelial cells) involved in CSC growth and maintenance.     | GBM/GSC         | RT-qPCR        | [55, 59]     |
| CXCR4              | CD184                                               | Receptor                                    | Membrane           | MIF & CXCL12 receptor. Migration, invasion and therapeutic resistance. GSC maintenance.                      | GSC             | RT-qPCR/FC     | [58, 60, 61] |
| CXCR7              | Atypical chemokine receptor 3 (ACKR3)               | Receptor                                    | Membrane           | Co receptor for CXCL12/MIF. Apoptosis escape. Associated with differentiated cells.                          | GSC             | RT-qPCR        | [62-64]      |
| EZH2               | Enhancer of zest homolog 2                          | Enzyme involved in gene repression          | Cytoplasm-Nucleus  | Stem cell self-renewal. Growth and survival in stress condition: therapeutic resistance.                     | PN GSC          | RT-qPCR        | [49, 50]     |
| Fibronectin 1      | <i>FN1</i>                                          | ECM (cell adhesion)                         | Cytoplasm-secreted | Mesenchymal cell marker. Adhesion, invasion, migration.                                                      | EMT             | RT-qPCR        | [65]         |
| GFAP               | Glial fibrillary acidic protein                     | Cytoskeleton                                | Cytoplasm          | Glial (astrocytic) differentiation marker also associated with neural stem cells.                            | GBM             | ICC            | [14, 31, 66] |
| Integrin α5        | CD49e                                               | Adhesion molecule                           | Cytoplasm          | Associated with EMT (and resistance) in other cancers. Invasion in GBM.                                      | EMT             | RT-qPCR/FC     | [67]         |
| Integrin α6        | CD49f                                               | Adhesion molecule                           | Cytoplasm          | GSC self-renewal and proliferation. Potential GSC target.                                                    | GSC             | RT-qPCR/FC     | [35]         |
| L1CAM              | L1 cell adhesion molecule                           | Adhesion molecule                           | Membrane           | NSC maintenance. Potential GSC target. Associated with resistance and invasion.                              | GSC             | RT-qPCR        | [65, 68]     |
| MIF                | Macrophage migration inhibitory                     | Cytokine                                    | Cytoplasm-secreted | Proliferation, migration, apoptosis escape, GSC maintenance. Recognized by CXCR4/7 CD74 and CD44 heteromers. | GSC and EMT     | RT-qPCR        | [45, 69]     |
| Nanog              | Homeobox protein NANOG (hNanog)                     | Transcription factor                        | Cytoplasm-Nucleus  | Pluripotency maintenance.                                                                                    | GSC             | RT-qPCR        | [70]         |
| Nestin             | Neuroepithelial stem cell protein                   | Cytoskeleton                                | Cytoplasm          | Neural progenitor marker. Expressed in GBM and GSC.                                                          | GSC             | RT-qPCR/ICC    | [14, 52, 53] |

## Induced dedifferentiated glioblastoma stem cells models

|             |                                                               |                       |                    |                                                                                                    |        |             |          |
|-------------|---------------------------------------------------------------|-----------------------|--------------------|----------------------------------------------------------------------------------------------------|--------|-------------|----------|
| Oct3/4      | POU domain, class 5, transcription factor 1 ( <i>POU5F1</i> ) | Transcription factor  | Cytoplasm-Nucleus  | Pluripotency maintenance.                                                                          | GSC    | RT-qPCR     | [71, 72] |
| Olig2       | Oligodendrocyte transcription factor                          | Transcription factor  | Cytoplasm-Nucleus  | Glial progenitor proliferation. Gliomagenesis. GSC maintenance.                                    | PN GSC | RT-qPCR/ICC | [51, 73] |
| S100A4      | Fibroblast-specific protein 1 ( <i>FSP1</i> )                 | Intracellular protein | Cytoplasm-Nucleus  | Expressed in GSC, associated with EMT. Potential target. Cell cycle and differentiation regulator. | EMT    | RT-qPCR     | [74]     |
| Snail2      | <i>SLUG</i>                                                   | Transcription factor  | Cytoplasm-Nucleus  | Expressed in GSC, associated with EMT. Antiapoptotic activity.                                     | EMT    | RT-qPCR     | [75]     |
| Sox2        | SRY (sex determining region Y)-box 2                          | Transcription factor  | Cytoplasm-Nucleus  | Pluripotency maintenance. GSC stemness. Associated to EMT.                                         | GSC    | RT-qPCR     | [8, 76]  |
| Osteopontin | <i>SPP1</i>                                                   | ECM (cell adhesion)   | Cytoplasm-secreted | Binds CD44. GSC promotion. Proliferation, invasion angiogenesis.                                   | GSC    | RT-qPCR     | [39, 77] |
| SSEA-1      | Stage-specific embryonic antigen 1 or CD15                    | Cell surface antigen  | Membrane           | Associated with stem cells. Involved in cell-cell recognition.                                     | GSC    | RT-qPCR/FC  | [49, 78] |
| VEGF-A      | Vascular endothelial growth factor A                          | Growth factor         | Cytoplasm-secreted | Angiogenesis. Upregulation of CXCR4 and CXCL12. Upregulated by CXCR pathways.                      | GBM    | RT-qPCR     | [63, 79] |
| VEGF-C      | Vascular endothelial growth factor C                          | Growth factor         | Cytoplasm-secreted | Angiogenesis. Upregulation of CXCR4 and CXCL12. Upregulated by CXCR pathways.                      | GBM    | RT-qPCR     | [63, 79] |
| ZEB1        | Zinc finger E-box-binding homeobox 1                          | Transcription factor  | Cytoplasm-Nucleus  | Increased expression in GBM. Induces N-Cadherin expression, E-Cadherin repression.                 | EMT    | RT-qPCR     | [56]     |

Abbreviation: CSC, Cancer Stem Cells; GBM, Glioblastoma; GSC, Glioblastoma Stem Cell; ECM, Extracellular matrix; EMT, Epithelial-mesenchymal transition; FC, Flow cytometry; ICC, Immunocytochemistry; PN, Proneural; RT-qPCR, Reverse Transcription-quantitative Polymerase Chain Reaction.

## Induced dedifferentiated glioblastoma stem cells models

**Table S2.** Antibodies used for flow cytometry analysis

| Target        | Fluorochrome | Species           | Isotype | Reference   |
|---------------|--------------|-------------------|---------|-------------|
| CXCR4         | APC          | Mouse             | IgG2ak  | 130-123-814 |
| –             | APC          | Mouse             | IgG2a   | 130-113-269 |
| CD44          | FITC         | Mouse             | IgG1k   | 130-113-334 |
| –             | FITC         | Mouse             | IgG1    | 130-113-199 |
| CD133         | PE           | Recombinant human | IgG1    | 130-110-962 |
| CD49e (ITGA5) | PE           | Recombinant human | IgG1    | 130-110-590 |
| CD49f (ITGA6) | PE           | Recombinant human | IgG1    | 130-119-807 |
| –             | PE           | Recombinant human | IgG1    | 130-113-438 |
| CD74          | APC-Vio770   | Mouse             | IgG1k   | 130-101-533 |
| –             | APC-Vio770   | Mouse             | IgG1k   | 130-113-759 |
| A2B5          | PE           | Mouse             | IgM     | 130-123-953 |
| –             | PE           | Mouse             | IgM     | 130-120-156 |
| CD90          | FITC         | Recombinant human | IgG1    | 130-114-859 |
| –             | FITC         | Recombinant human | IgG1    | 130-113-449 |
| CD36          | Viogreen     | Recombinant human | IgG1    | 130-110-883 |
| –             | Viogreen     | Recombinant human | IgG1    | 130-113-456 |
| CD15          | Vioblue      | Mouse             | IgM     | 130-114-014 |
| –             | Vioblue      | Mouse             | IgM     | 130-098-589 |

All antibodies were purchased from Miltenyi.

**Table S3.** Antibodies used for immunocytochemistry and corresponding dilutions

| Target | Species | Isotype | Supplier  | Reference | Dilution |
|--------|---------|---------|-----------|-----------|----------|
| GFAP   | Rabbit  | IgG     | Sigma     | G4546     | 1:200    |
| Nestin | Rabbit  | IgG     | Sigma     | N5413     | 1:200    |
| Olig2  | Rabbit  | IgG     | Diagomics | BSB2562   | 1:150    |

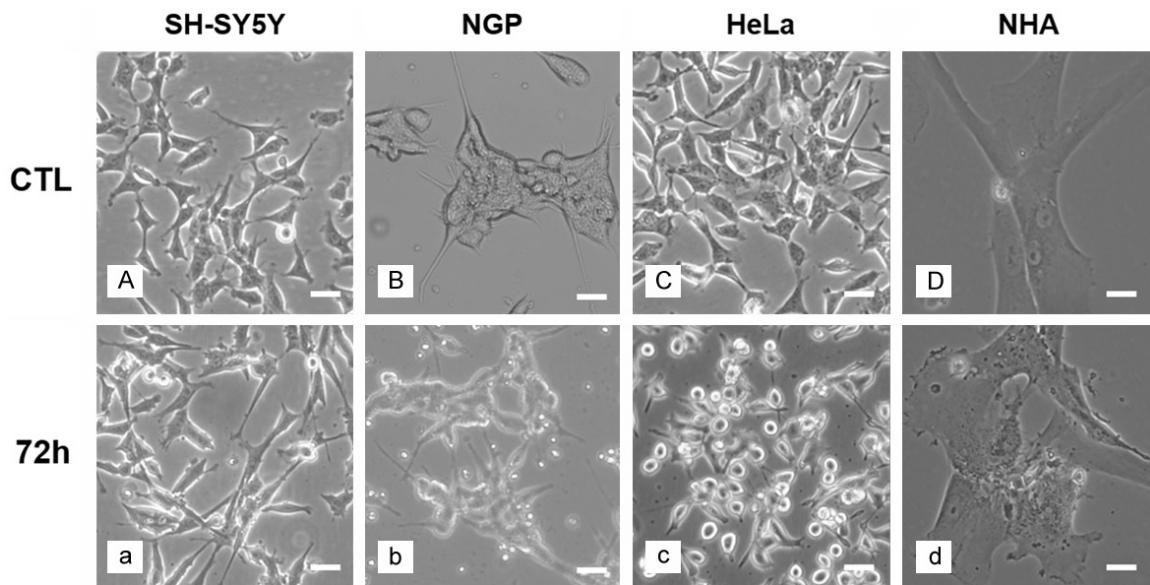

**Figure S1.** Non-glioblastoma cell lines do not form spheres in dedifferentiation medium. Microscope observations of SH-SY5Y (A, a), NGP (B, b), HeLa (C, c) and NHA (D, d) cells. Capital letters are used for cells in classical medium (CTL) and lowercase letter for cells incubated 72 h in dedifferentiated medium (72 h). Scale is 30  $\mu$ m.

## Induced dedifferentiated glioblastoma stem cells models

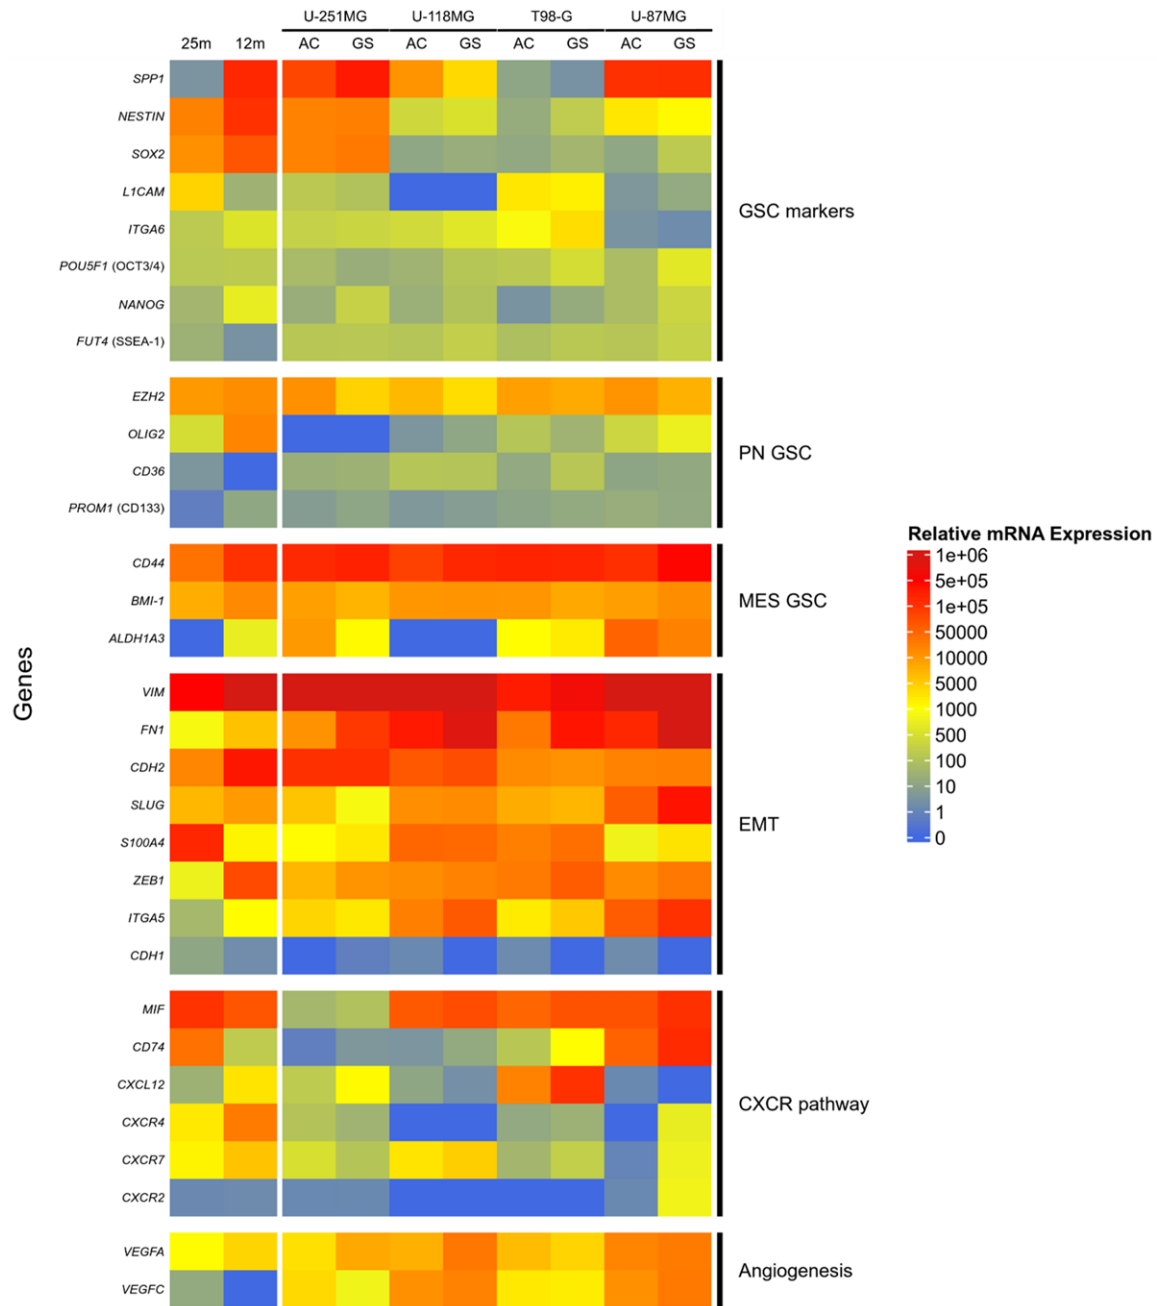

**Figure S2.** Transcriptional expression supports a mesenchymal GSC profile in gliospheres and dedifferentiation is associated with higher expression of stem-cell, EMT and CXCR associated genes. RT-qPCR analysis of gene expression in U-251MG, U-118MG, T98-G and U-87MG adherent cells (AC) and dedifferentiated gliospheres (GS) and in BTIC 25m and 12m. Relative mRNA expression was calculated and normalized according to Vandesompele method with two control genes (GAPDH and HPRT1) and an internal calibrator. Expression levels are colored from blue to red with increasing values. Genes are sorted by mean expression level in each group. PN: Proneural, MES: Mesenchymal, EMT: Epithelial-Mesenchymal Transition.

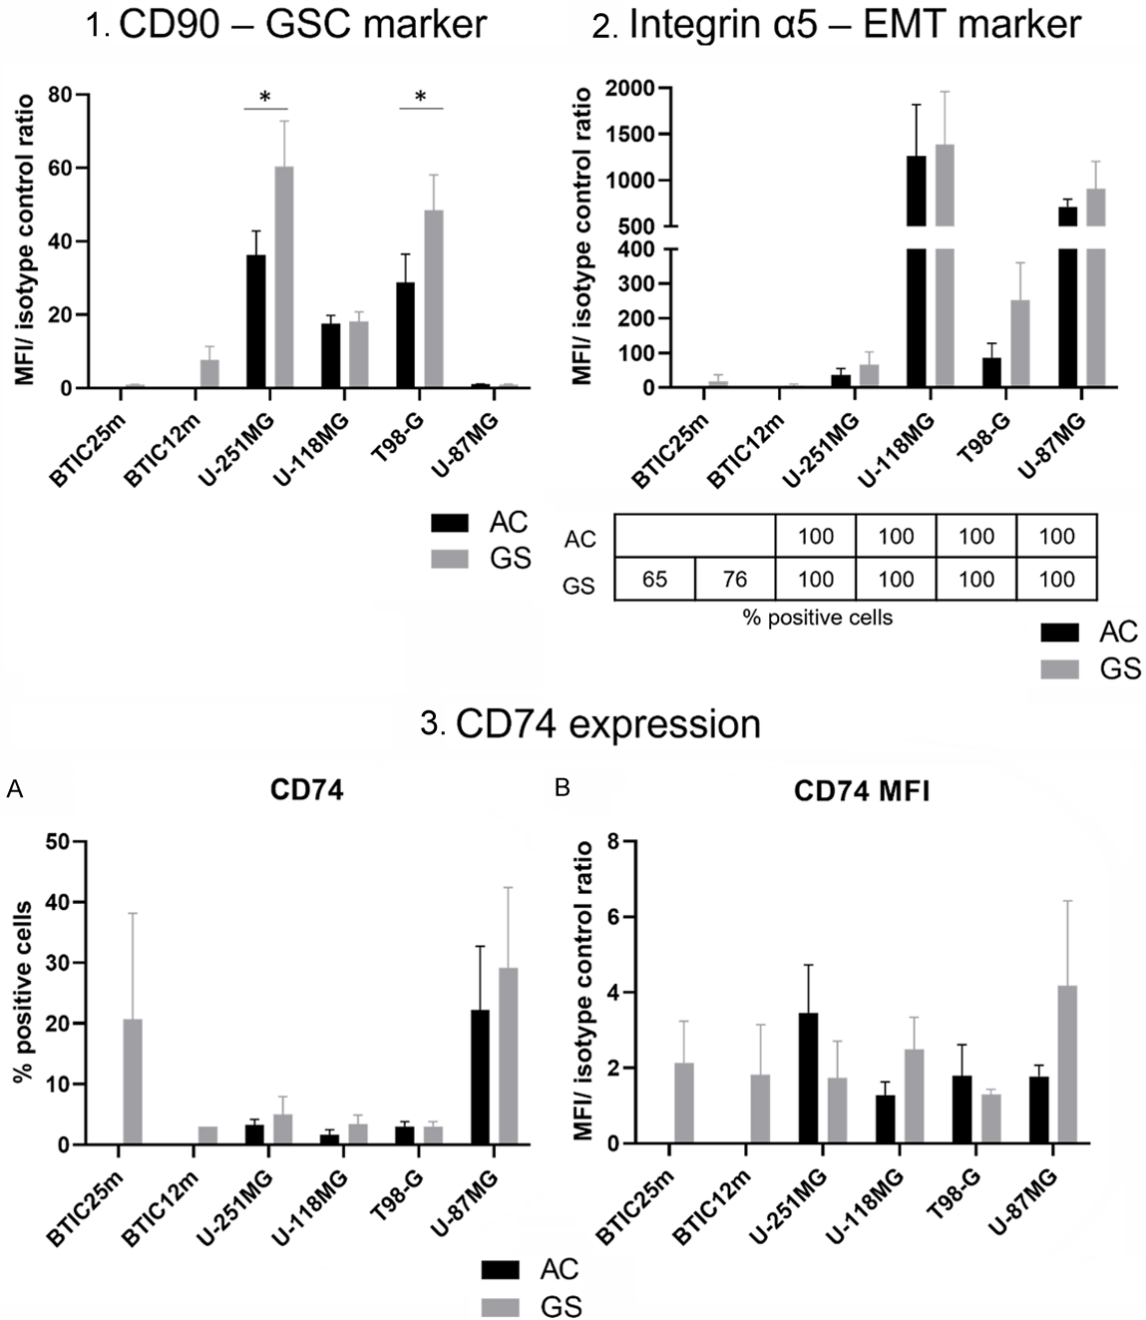

**Figure S3.** Change in membrane markers expression supports acquisition of GSC with a mainly mesenchymal phenotype in dedifferentiated gliospheres models. Flow cytometry analysis of CD90 GSC marker, integrin  $\alpha 5$  EMT marker and CD74 in U-87MG, U-118MG, U-251MG, T98-G and BTIC 25m and 12m. Adherent cells (AC) were used as control for dedifferentiated gliospheres (GS). CD90 staining results are shown as mean fluorescence ratio (1), similarly to integrin  $\alpha 5$  with corresponding positive cells percentage in the table below (2). Percentage of positive cells are represented for CD74 with corresponding mean fluorescence ratios (A and B). Mean fluorescence ratio is calculated as mean fluorescence intensity (MFI) of stained sample MFI. Statistical significance was calculated using Mann-Whitney test on n=4 independent experiments. \**p*-value <0.05.

## Induced dedifferentiated glioblastoma stem cells models

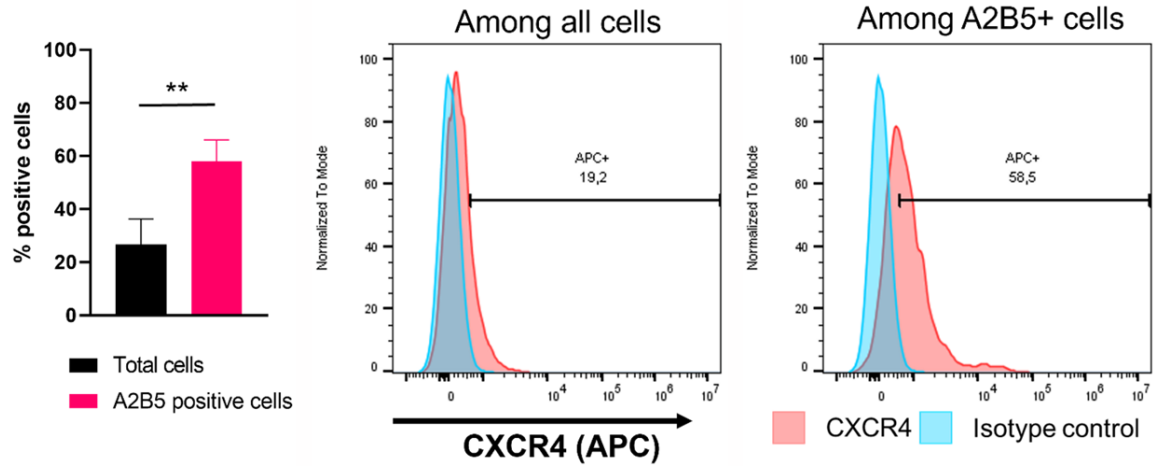

**Figure S4.** CXCR4 expression is higher in A2B5 positive population in U-118MG dedifferentiated gliospheres. Flow cytometry analysis of CXCR4 staining in U-118MG double stained for A2B5 marker. Percentage of positive cells are represented for n=5 independent experiments (left). Statistical significance was calculated using Mann-Whitney test (P=0.0079). Example of a corresponding flow cytometry histogram (right).
